# Supplementary material for: Environment-friendly synthesis and performance of a novel hyperbranched epoxy resin with a silicone skeleton
Source: Royal Society of Chemistry journal article supplement (doi:10.1039/c2ra22969b), 2012-12-21
Supplement: c2ra22969b.pdf [file c2ra22969b.pdf]

## Supporting Information

### Environment-friendly Synthesis and Performance of a Novel Hyperbranched Epoxy Resin with Silicone Skeleton

Daohong Zhang<sup>1\*</sup>, Enbin Liang<sup>1</sup>, Tingcheng Li<sup>1</sup>, Sufang Chen<sup>2</sup>, Junheng Zhang<sup>1</sup>, Xinjian  
Cheng<sup>1</sup>, Jiliang Zhou<sup>1</sup>, Aiqing Zhang<sup>1</sup>

<sup>1</sup>Key Laboratory of Catalysis and Materials Science of the State Ethnic Affairs Commission &  
Ministry of Education, South-central University for Nationalities, Wuhan, Hubei Province, 430074,  
China;

<sup>2</sup>Key Laboratory for Green Chemical Process of Ministry of Education, Wuhan Institute of  
Technology, Wuhan, Hubei 430073, China.

\*Corresponding author, Prof. Dr. D.Zhang, Tel:+86-27-67842752, Fax: +86-27-67842752, email:  
[zhangdh27@163.com](mailto:zhangdh27@163.com).

## Contents of supporting information

**Figure S1.** Relationship between recycled times of the halloysite-supported platinum catalyst and FT-IR spectra of the product.

**Figure S2.** Relationship between conversion of Si-H bond and recycled times of the halloysite-supported platinum catalyst.

**Figure S3.** OM micrographs of 9wt%HERSS/91wt%DGEBA on the surface of glass slide with curing time: (a) 0 min, (b) 5min, (c) 10min, (d) 30min and (e) 60min.

**Figure S4.** DSC curves of HERSS/DGEBA composites and DGEBA.

**Figure S5.** TGA curves of HERSS/DGEBA composites and DGEBA.

**Table S1.** TGA data of HERSS/DGEBA composites and DGEBA.

**S1.** FT-IR data of TMDS, AGE, TDPGE, PTAS, AHRSS and HERSS.

**S2.**  $^1\text{H}$  NMR data of TDPGE, PTAS, AHRSS and HERSS.

**S3.**  $^{13}\text{C}$  NMR data of TDPGE, PTAS, AHRSS and HERSS.

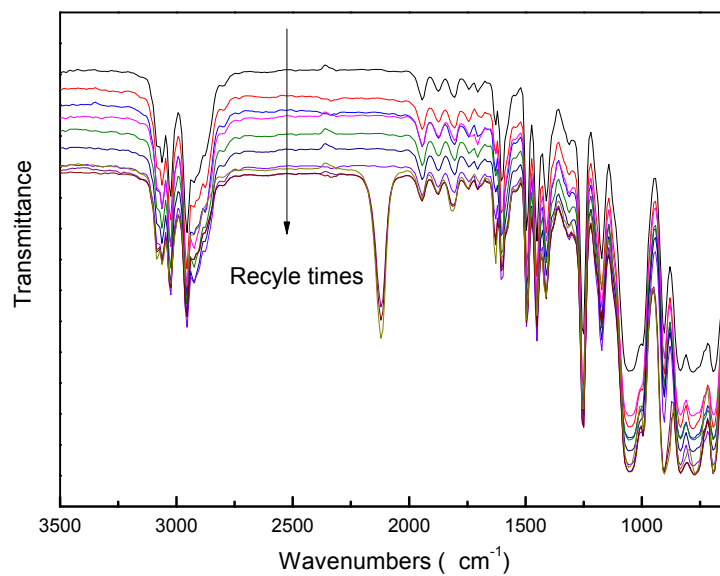

**Figure S1.** Relationship between recycled times of the halloysite-supported platinum catalyst and FT-IR spectra of the product.

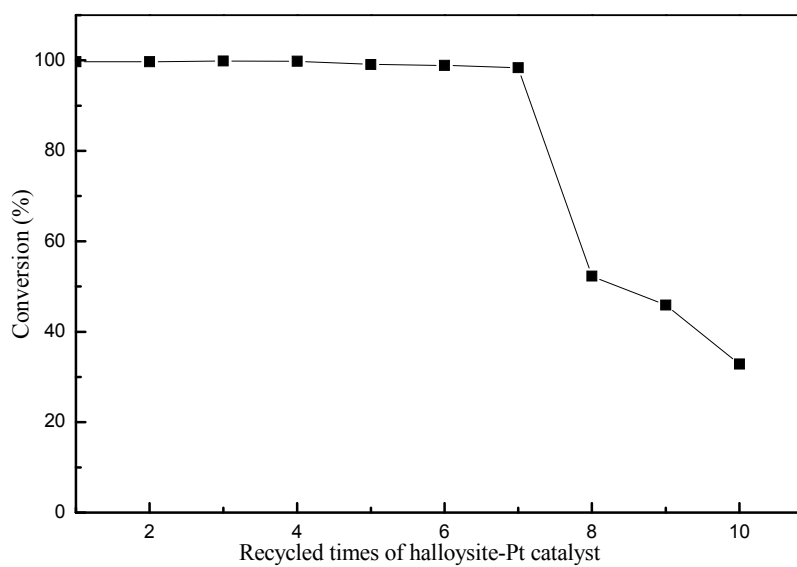

**Figure S2.** Relationship between conversion of Si-H bond and recycled times of the halloysite-supported platinum catalyst.

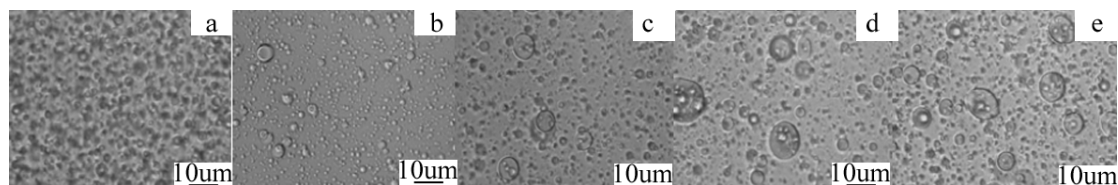

**Figure S3.** OM micrographs of 9wt%HERSS/91wt%DGEBA on the surface of glass slide with curing time: (a) 0 min, (b) 5min, (c) 10min, (d) 30min and (e) 60min.

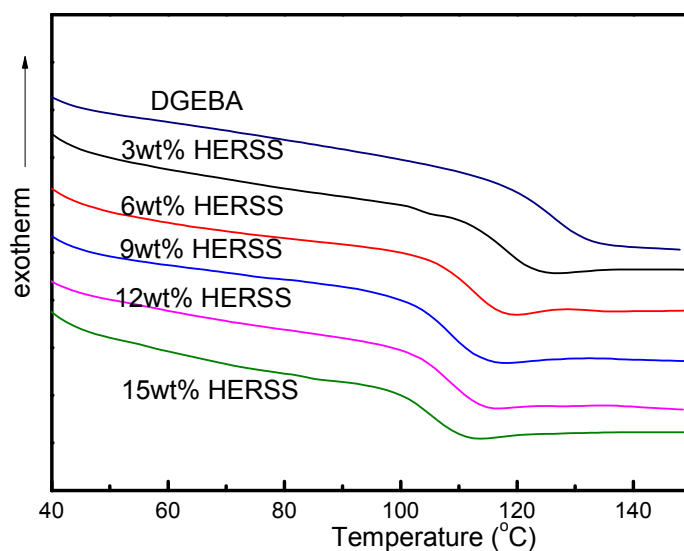

**Figure S4.** DSC curves of HERSS/DGEBA composites and DGEBA.

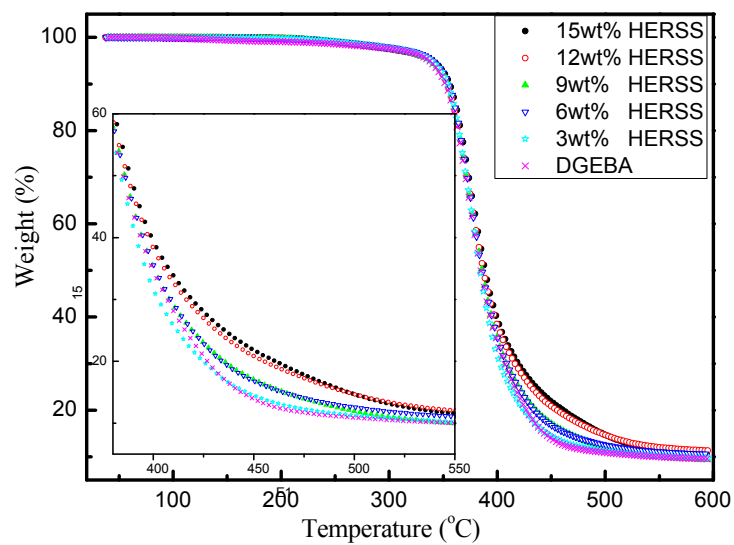

**Figure S5.** TGA curves of HERSS/DGEBA composites and DGEBA.

**Table S1.** TGA data of HERSS/DGEBA composites and DGEBA.

| Typical data                  | <i>T<sub>i</sub></i> (Temp.5%<br>weight loss)<br>(°C) | Temp.10%<br>weight<br>loss(°C) | Temp. Max.<br>Degrad. Rate<br>(°C) |
|-------------------------------|-------------------------------------------------------|--------------------------------|------------------------------------|
| DGEBA-DETA-AN                 | 337.5                                                 | 352.1                          | 378.4                              |
| 3wt% HERSS<br>/DGEBA-DETA-AN  | 339.4                                                 | 354.0                          | 379.6                              |
| 6wt% HERSS<br>/DGEBA-DETA-AN  | 340.5                                                 | 355.1                          | 375.6                              |
| 9wt% HERSS<br>/DGEBA-DETA-AN  | 340.2                                                 | 354.6                          | 376.5                              |
| 12wt% HERSS<br>/DGEBA-DETA-AN | 339.6                                                 | 353.8                          | 375.2                              |
| 15wt% HERSS<br>/DGEBA-DETA-AN | 340.1                                                 | 356.0                          | 373.6                              |
| DGEBA-MNA                     | 99.1                                                  | 306.7                          | 368.6                              |
| HERSS-MNA                     | 380.0                                                 | 401.0                          | 468.5                              |

### S1. FT-IR data of TMDS, AGE, TDPGE, PTAS, AHRSS and HERSS.

Characteristic bonds of TMDS in FT-IR (KCl,  $\text{cm}^{-1}$ ): 2955 (s,  $\text{CH}_3$ ), 2121 (s, Si-H), 1254 (s, Si-C), 1052 (s, Si-O-Si). AGE (KCl,  $\text{cm}^{-1}$ ): 3059 (s, =C-H), 1646 (s, CH=CH<sub>2</sub>), 1250 (s, C-O-C), 912 (s, epoxy group). TDPGE (KCl,  $\text{cm}^{-1}$ ): 2121 (s, Si-H), 1254 (s, C-O-C), 912 (s, epoxy group). PTAS (KCl,  $\text{cm}^{-1}$ ): 3060 (s, =C-H), 1629 (s, CH=CH<sub>2</sub>). AHRSS (KCl,  $\text{cm}^{-1}$ ): 3060 (s, =C-H), 1629 (s, CH=CH<sub>2</sub>). HERSS (KCl,  $\text{cm}^{-1}$ ): 1250 (s, C-O-C), 905 (s, epoxy group).

### S2. <sup>1</sup>H NMR data of TDPGE, PTAS, AHRSS and HERSS.

PTAS (<sup>1</sup>H NMR,  $\text{CDCl}_3$ , ppm):  $\delta$  1.89-1.91 (c, 2H), 4.91-4.98 (a, 2H), 5.78-5.89

(b, 1H), 7.39-7.56 (d, 5H). TDPGE ( $^1\text{H}$  NMR,  $\text{CDCl}_3$ , ppm):  $\delta$  4.63-4.75 (n, 1H), 3.63-3.77 ( $j_1$ , 1H), 3.41-3.45 (i, 2H), 3.35-3.41 ( $j_2$ , 1H), 3.05-3.14 (k, 1H), 2.73-2.83 ( $m_1$ , 1H), 2.53-2.63 ( $m_2$ , 1H), 1.51-1.65 (h, 2H), 0.48-0.59 (g, 2H), 0.04-0.25 (e, f, 12H). AHRSS ( $^1\text{H}$  NMR,  $\text{CDCl}_3$ , ppm):  $\delta$  7.22-7.62 (d, 5H), 5.66-5.93 (b, 1H), 4.68-5.05 (a, 2H), 1.74-2.00 (c, 2H), 1.31-1.57 (p, 2H), 0.81-1.09 (r, 2H), 0.43-0.81 (t, 2H). HERSS ( $^1\text{H}$  NMR,  $\text{CDCl}_3$ , ppm):  $\delta$  7.23-7.57 (d, 5H), 3.65-3.80 ( $j_1$ , 1H), 3.43-3.58 (i, 2H), 3.32-3.43 ( $j_2$ , 1H), 3.08-3.21 (k, 1H), 2.73-2.84 ( $m_1$ , 1H), 2.53-2.64 ( $m_2$ , 1H), 1.54-1.73 (h, 2H), 1.27-1.48 (p, 2H), 0.82-0.95 (r, 2H), 0.55-0.71 (t, 2H), 0.46-0.55 (g, 2H).

### S3. $^{13}\text{C}$ NMR data of TDPGE, PTAS, AHRSS and HERSS.

PTAS (100 MHz  $^{13}\text{C}$  NMR,  $\text{CDCl}_3$ , ppm):  $\delta$  134.03-134.19 (d, C), 133.06-133.23 (e, C), 132.60-132.89 (b, C), 128.08-128.40 (g, C), 126.36-126.95 (f, C), 112.91-113.52 (a, C), 18.30-18.68 (c, C), 76.8-77.5 ( $\text{CDCl}_3$ , C). TDPGE (100 MHz  $^{13}\text{C}$  NMR,  $\text{CDCl}_3$ , ppm):  $\delta$  74.42-74.71 (i, C), 71.71-71.94 (k, C), 50.94-51.26 (m, C), 44.16-44.55 (p, C), 23.65-23.99 (j, C), 13.25-15.32 (i, C), 0.21-1.25 (h, C), 76.8-77.5 ( $\text{CDCl}_3$ , C). AHRSS (100 MHz  $^{13}\text{C}$  NMR,  $\text{CDCl}_3$ , ppm):  $\delta$  134.74-135.19 (d, C), 134.21-134.68 (e, C), 133.75-134.15 (b, C), 128.79-129.75 (g, C), 127.52-128.40 (f, C), 112.86-115.62 (a, C), 19.53-21.03 (c, C), 17.56-18.28 (r, C), 16.08-17.42 (q, C), 13.43-14.61 (t, C), 0.2-1.79 (h, C), 76.8-77.5 ( $\text{CDCl}_3$ , C). HERSS (100 MHz  $^{13}\text{C}$  NMR,  $\text{CDCl}_3$ , ppm):  $\delta$  134.59-134.76 (d, C), 134.19-134.45 (e, C), 128.73-129.02 (g, C), 127.70-128.10 (f, C), 74.08-74.80 (i, C), 71.22-72.01 (k, C), 50.71-51.31 (m, C),

44.05-44.77 (p, C), 23.66-24.24 (j, C), 18.03-18.34 (r, C), 17.10-17.56 (q, C),  
14.35-14.82 (t, i, C), 0.35-0.90 (h, C), 76.8-77.5 (CDCl<sub>3</sub>, C).
